# Supplementary material
Source: Research Square preprint supplement (doi:10.21203/rs.3.rs-9576430/v1)
Supplement: Supplementary file 1 [file 12b0dea754c266a0eed8ab5f.docx]

**RESPONSE TO REVIEWER FEEDBACK FROM JIBE WORKSHOP**

**Journal of Industrial and Business Economics (JIBE)**

***Special Issue:***

***'Africa in the New Global Order – Rethinking Theories, Strategies, Policies, and Partnerships***'

***Manuscript: 'Climate Justice or Green Protectionism? A Critical Discourse Analysis of the EU's CBAM and the Silencing of African Agency'***

*Author: Dr Dev K (Roshan) Boojihawon | Date: 30TH APRIL 2026*

Dear Guest Editors,

Thank you for the thoughtful and developmental feedback provided through the JIBE Idea and Paper Development Workshop. I have found the reviewer's observations highly constructive, and they have prompted significant strengthening of the manuscript.

The revisions address each concern systematically while preserving the paper's core critical and conceptual contribution. I believe the revised manuscript now speaks more directly to the Special Issue's themes of international business, global value chains, and structural transformation in Africa, while maintaining its distinctive discourse-analytical and climate justice lens.

Below I provide a detailed point-by-point response. All changes are visible in the colour-coded revised manuscript:

***Reviewer Comment 1***: *The manuscript is presently positioned primarily within critical political economy and discourse analysis, whereas the Special Issue seeks contributions that also help explain how external shocks, policies, and governance mechanisms reshape production structures, firm strategies, and upgrading trajectories on the continent. One of the most important improvements would be to make more explicit how CBAM translates into concrete implications for the organisation of production, investment decisions, and participation in global value chains.*

**Response**:

I fully accept this critique and consider it the most substantive structural revision the paper required. The original submission was deliberately positioned within critical discourse and legitimacy theory, but the reviewer is correct that the Special Issue calls for an explicit engagement with IB and GVC dynamics. I have responded in three ways:

(1) New Section 2.1: 'CBAM as Extraterritorial Green Industrial Policy'

I have added a new sub-section (Section 2.1) that explicitly theorises CBAM as a form of extraterritorial regulatory policy with industrial consequences for African producers. Drawing on Narula (2018), Strange and Zucchella (2017), and Buckley et al. (2017), the paper frames CBAM as a source of institutional distance and regulatory risk — a non-market institutional force reshaping competitive landscapes for firms in affected value chains.

(2) New Section 2.2: 'CBAM and Global Value Chain Governance'

I have added a focused section (Section 2.2) deploying Gereffi et al.'s (2005) GVC governance framework to analyse how CBAM intensifies captive governance dynamics in EU-Africa value chains. The paper now engages with Humphrey and Schmitz's (2002) upgrading theory to show how CBAM compliance requirements may constrain, rather than enable, African supplier upgrading, and with Ponte and Sturgeon (2014) on quality conventions. The paper provides illustrative sectoral examples for aluminium (South Africa's Hillside smelter, Mozambique's Mozal facility), steel, and fertilisers.

(3) New Section 2.3: 'Non-Market Strategy and African Responses'

I have added a third sub-section (Section 2.3) engaging with IB non-market strategy scholarship (Baron, 1995; Mellahi et al., 2016) to frame how African governments and firms might strategically respond to CBAM, including through AfCFTA coordination, investment in Monitoring, Reporting and Verification (MRV) capacity, and green certification strategies.

***Reviewer Comment 2:*** *The paper would gain additional traction if it clarified whether CBAM is likely to: (a) accelerate green upgrading in some sectors; (b) reinforce patterns of marginalisation in others; or (c) trigger relocation and supplier substitution by multinational firms. Even illustrative sectoral examples or stylised evidence on exposure across countries would help anchor the argument*.

**Response**:

This is an excellent suggestion that I have acted on substantively. I have incorporated three distinct lines of revision: *First*, in the revised Section 4.2 (Climate Justice Contestations), I have added a substantive paragraph drawing on quantitative estimates from Magacho et al. (2023) and Bassi et al. (2024) to anchor distributional justice claims in concrete economic evidence. The paper notes that CBAM could reduce African exports to the EU by up to 5.5% in covered sectors, with Zimbabwe, Mozambique, and South Africa among the most exposed. The paper discusses the specific exposure of African aluminium producers in detail. *Second*, in Section 4.3 (Legitimacy Struggles), I have added an IB-oriented paragraph (in the Rationalisation discussion) addressing how CBAM's legitimation strategies signal higher regulatory risk to MNEs considering African suppliers, potentially accelerating supplier substitution, directly addressing the reviewer's third scenario (relocation/substitution). *Third*, in Section 5 (Discussion), I have added a paragraph using Gereffi et al.'s (2005) GVC governance typology to frame the 'trilemma' facing African firms: green upgrading (capital-constrained), market marginalisation, or export redirection to non-EU markets. This addresses all three of the reviewer's scenarios within a unified analytical framework.

**Reviewer Comment 3**: *The paper could benefit from engaging more directly with the IB and GVC literature. At present, the discussion of power asymmetries and legitimacy is strong, but it is not always clear how the analysis connects to established IB debates on regulatory risk, non-market strategy, lead-firm governance, or the role of standards in reshaping value chain participation.*

**Response**:

I agree that the original manuscript's IB literature engagement was limited. The revisions described in response to Comment 1 directly address this gap. Specifically:

- IB regulatory risk: Framed via Strange and Zucchella (2017) and Narula (2018) in Section 2.1.
- Non-market strategy: Baron (1995) and Mellahi et al. (2016) introduced in Section 2.3 to frame African government and firm responses.
- Lead-firm governance: Gereffi et al. (2005) GVC governance typology integrated in Section 2.2 and applied in Section 5.
- Standards and value chain participation: Humphrey and Schmitz (2002) upgrading theory and Ponte and Sturgeon (2014) quality conventions framework applied in Section 2.2 and Section 4.1.
- The Abstract, Introduction (Section 1), and Conclusion (Section 7) have also been revised to foreground the IB contribution more explicitly, ensuring the paper's positioning within the Special Issue is clear from the outset.

**Reviewer Comment 4:** *The paper would benefit from making more explicit whether CBAM is interpreted as: (a) a new form of green industrial policy with extraterritorial effects; (b) a regulatory instrument reshaping global production geography; or (c) primarily a legitimacy contest over climate governance. Clarifying this would also help readers better understand the paper's theoretical contribution*.

**Response**:

This is a valuable clarifying question. The revised manuscript explicitly addresses this in the Introduction (Section 1) and in the new Section 2.1. The paper now argues that CBAM operates simultaneously in all three registers: a 'triple register' analytical position:

(a) As extraterritorial green industrial policy: CBAM exports EU regulatory standards to third countries, reshaping incentive structures for African producers (Section 2.1, drawing on Narula, 2018; Buckley et al., 2017).

(b) As a regulatory instrument reshaping global production geography: CBAM affects lead-firm sourcing decisions, MNE supply chain structures, and African supplier upgrading trajectories (Sections 2.2, 4.3, 5).

(c) As a legitimacy contest: The original CDA framework is retained and enriched by the IB/GVC additions, showing how legitimacy struggles have material consequences beyond the discursive (Sections 2.3, 5).

The Introduction (Section 1, final paragraph before methodology overview) has also been revised to flag this explicitly for readers.

**Reviewer Comment 5**: *The policy discussion is timely and important, but it currently remains somewhat general. The manuscript could be strengthened by specifying more concretely what different actors might do in response, e.g. African governments, regional organisations, or firms operating in affected sectors. This could include certification capacity, green industrial policy, regional coordination, or strategies to avoid exclusion from low-carbon value chains.*

**Response**:

The policy section (Section 6) has been substantively revised to provide actor-specific recommendations across four groups:

• African governments: Coordinated regional response through AfCFTA; development of pan-African carbon pricing or certification schemes; leveraging AfCFTA's emerging Industrial Policy and AU Agenda 2063 frameworks.

• African firms in CBAM sectors: Investment in MRV capacity as both compliance and strategic upgrading platform; targeted engagement with EU climate finance instruments; repositioning within low-carbon GVCs.

• MNEs in EU-Africa value chains: Regulatory risk assessment of African supply chains; partnering with African suppliers on green upgrading rather than substituting towards other regions, to secure resilient, diversified supply chains.

• EU policymakers: Redirecting CBAM revenues towards African decarbonisation support; reinforcing WTO compatibility through a genuine redistribution mechanism; institutionalising African stakeholder voice in CBAM governance design.

I hope that these revisions demonstrate a genuine and substantive engagement with the reviewer's feedback. The manuscript has been significantly strengthened without losing its distinctive critical and CDA-grounded contribution, and I believe it now speaks directly to the core concerns of the JIBE Special Issue while offering an original theoretical and methodological perspective. I look forward to the editors' further assessment.

Yours sincerely,

Dr Dev K (Roshan) Boojihawon

Associate Professor of Strategy and International Business

Birmingham Business School, University of Birmingham

d.k.boojihawon@bham.ac.uk
